# Supplementary material for: The STRIDE Weight Loss and Lifestyle Intervention for Individuals Taking Antipsychotic Medications: A Randomized Trial
Source: Atypon-hosted journal article supplement (doi:10.1176/appi.ajp.2014.14020173), 2014-12-17
Supplement: appi.ajp.2014.14020173.ds001.pdf [file appi.ajp.2014.14020173.ds001.pdf]

**Supplementary Table A.** Unadjusted results of intervention on primary study outcomes

|                                | Δ Baseline-6 mo. |                             | Δ 6 mo.-12 mo. |                             | Δ Baseline-12 mo. |                             | P value |
|--------------------------------|------------------|-----------------------------|----------------|-----------------------------|-------------------|-----------------------------|---------|
|                                | Coef.            | 95% CI<br>(lower,<br>upper) | Coef.          | 95% CI<br>(lower,<br>upper) | Coef.             | 95% CI<br>(lower,<br>upper) |         |
| Weight, kg                     | -4.47            | -7.05, -1.88                | 1.77           | -0.87, 4.40                 | -2.70             | -5.20, -0.20                | 0.003   |
| BMI, kg/m <sup>2</sup>         | -1.59            | -2.51, -0.68                | 0.57           | -0.35, 1.50                 | -1.02             | -1.93, -0.11                | 0.003   |
| Systolic blood pressure mmHg   | -3.17            | -7.47, 1.13                 | 4.66           | 0.38, 8.95                  | 1.50              | -2.82, 5.81                 | 0.093   |
| Diastolic blood pressure, mmHg | -2.30            | -5.12, 0.51                 | 2.94           | 0.15, 5.73                  | 0.64              | -2.37, 3.65                 | 0.086   |
| Fasting Glucose, mg/dL         | -0.02            | -0.10, 0.06                 | -0.06          | -0.16, 0.03                 | -0.08             | -0.17, 0.01                 | 0.192   |
| Fasting insulin, μU/mL         | 0.16             | -0.06, 0.37                 | -0.21          | -0.68, 0.26                 | -0.05             | -0.49, 0.39                 | 0.325   |
| HOMA-IR <sup>a</sup>           | 0.07             | -0.15, 0.29                 | -0.14          | -0.36, 0.08                 | -0.21             | -0.47, 0.04                 | 0.247   |
| Diabetes risk <sup>b</sup>     | 0.01             | -1.82, 1.83                 | -1.46          | -3.60, 0.69                 | -1.45             | -3.33, 0.42                 | 0.274   |
| Fasting Triglycerides, mg/dL   | 1.46             | -32.55, 35.46               | -12.10         | -33.78, 9.58                | -10.64            | -43.52, 22.24               | 0.518   |
| Fasting LDL, mg/dL             | 0.23             | -6.37, 6.83                 | 2.05           | -4.93, 9.03                 | 2.28              | -5.58, 10.13                | 0.816   |
| Fasting HDL, mg/dL             | 0.68             | -1.26, 2.63                 | 1.94           | -0.28, 4.16                 | 2.62              | 0.13, 5.11                  | 0.107   |

<sup>a</sup>The Homeostasis Model Assessment Index for Insulin Resistance (HOMA-IR) is calculated as follows: fasting glucose [mmol/L] x fasting insulin [μU/mL]/22.5. Lower scores indicate lower risk for developing insulin resistance. Coefficients represent the change in the natural log of HOMA.

<sup>b</sup>Based on the Framingham Diabetes Risk Scale. Lower scores represent decreased risk of developing diabetes.
