# Supplementary material for: The STRIDE Weight Loss and Lifestyle Intervention for Individuals Taking Antipsychotic Medications: A Randomized Trial
Source: Atypon-hosted journal article supplement (doi:10.1176/appi.ajp.2014.14020173), 2014-12-17
Supplement: appi.ajp.2014.14020173.ds002.pdf [file appi.ajp.2014.14020173.ds002.pdf]

**Supplementary Table B:** Weight profile classifications of medications taken by participants to treat mental health symptoms or to manage mental health medication side-effects. Weight profiles for medications other than those classified as weight-neutral were treated as time-varying covariates in GEE analyses of weight and BMI. Note that some medications were prescribed for off-label use.

### SLIGHT/MODERATE WEIGHT LOSS

| Medication (generic name) | Drug Class                        |
|---------------------------|-----------------------------------|
| AMPHETAMINE               | amphetamine                       |
| ATOMOXETINE               | norepinephrine reuptake inhibitor |
| BUPROPION                 | non-tricyclic antidepressant      |
| FLUOXETINE                | SSRI antidepressant               |
| FLUVOXAMINE               | SSRI antidepressant               |
| LEVOTHYROXINE             | hormone                           |
| LIOTHYRONINE              | hormone                           |
| LISDEXAMFETAMINE          | amphetamine                       |
| METHYLPHENIDATE           | amphetamine                       |
| SELEGILINE                | MAOI antidepressant               |
| SERTRALINE                | SSRI antidepressant               |
| VENLAFAXINE               | SNRI antidepressant               |
| ZONISAMIDE                | anticonvulsant                    |

### WEIGHT NEUTRAL

|                  |                                   |
|------------------|-----------------------------------|
| ALPRAZOLAM       | benzodiazepine                    |
| ARIPIPRAZOLE     | atypical antipsychotic            |
| ARMODAFINIL      | amphetamine-related CNS stimulant |
| BENZTROPINE      | antiparkinsonian, anticholinergic |
| BUSPIRONE        | antianxiety                       |
| CANNABIS         | antiemetic                        |
| CHLORDIAZEPOXIDE | benzodiazepine                    |
| CITALOPRAM       | SSRI antidepressant               |
| CLONAZEPAM       | benzodiazepine                    |
| CLONIDINE        | antihypertensive                  |
| DIAZEPAM         | benzodiazepine                    |
| DIPHENHYDRAMINE  | antihistamine                     |
| DULOXETINE       | SNRI antidepressant               |
| ESCITALOPRAM     | SSRI antidepressant               |
| ESZOPICLONE      | hypnotic                          |
| HYDROXYZINE      | antihistamine                     |
| LAMOTRIGINE      | anticonvulsant                    |
| LORAZEPAM        | benzodiazepine                    |
| MILNACIPRAN      | SNRI antidepressant               |
| MODAFINIL        | amphetamine-related CNS stimulant |

|                 |                                   |
|-----------------|-----------------------------------|
| NEFAZODONE      | SNRI antidepressant               |
| PHENOBARBITAL   | barbiturate                       |
| PRAMIPEXOLE     | antiparkinsonian                  |
| PRAZOSIN        | alpha blocker                     |
| PROMETHAZINE    | antipsychotic                     |
| PROPRANOLOL     | beta blocker                      |
| TEMAZEPAM       | benzodiazepine                    |
| THIOTHIXINE     | antipsychotic                     |
| TOPIRAMATE      | anticonvulsant                    |
| TRAZODONE       | SARI antidepressant               |
| TRIFLUOPERAZINE | antipsychotic                     |
| TRIHXYLPHENIDYL | antiparkinsonian, anticholinergic |
| ZIPRASIDONE     | atypical antipsychotic            |
| ZOLPIDEM        | hypnotic                          |

#### **SLIGHT/MODERATE WEIGHT GAIN**

|               |                        |
|---------------|------------------------|
| PAROXETINE    | SSRI antidepressant    |
| ESTRADIOL     | hormone                |
| ASENAPINE     | atypical antipsychotic |
| OXCARBAZAPINE | antipsychotic          |
| HALOPERIDOL   | antipsychotic          |
| FLUPHENAZINE  | antipsychotic          |
| CARBAMAZEPINE | anticonvulsant         |
| GABAPENTIN    | anticonvulsant         |

#### **SEVERE WEIGHT GAIN**

|                |                            |
|----------------|----------------------------|
| AMITRIPTYLINE  | tricyclic antidepressant   |
| AMOXAPINE      | tricyclic antidepressant   |
| CHLORPROMAZINE | antipsychotic              |
| CLOMIPRAMINE   | tricyclic antidepressant   |
| CLOZAPINE      | atypical antipsychotic     |
| DESIPRAMINE    | tricyclic antidepressant   |
| DOXEPIN        | tricyclic antidepressant   |
| IMIPRAMINE     | tricyclic antidepressant   |
| LITHIUM        | antimanic                  |
| LURASIDONE     | atypical antipsychotic     |
| MIRTAZAPINE    | tetracyclic antidepressant |
| NORTRIPTYLINE  | tricyclic antidepressant   |
| OLANZAPINE     | atypical antipsychotic     |
| PALIPERIDONE   | atypical antipsychotic     |
| PERPHENAZINE   | antipsychotic              |
| PHENELZINE     | MAOI antidepressant        |
| PROTRIPTYLINE  | tricyclic antidepressant   |

QUETAIPINE  
RISPERIDONE  
VALPROATE

atypical antipsychotic  
atypical antipsychotic  
anticonvulsant
