# Supplementary material for: The STRIDE Weight Loss and Lifestyle Intervention for Individuals Taking Antipsychotic Medications: A Randomized Trial
Source: Atypon-hosted journal article supplement (doi:10.1176/appi.ajp.2014.14020173), 2014-12-17
Supplement: appi.ajp.2014.14020173.ds003.pdf [file appi.ajp.2014.14020173.ds003.pdf]

**Supplemental Table C:** Medications taken by participants and included in GEE analyses as time-varying covariates, organized by outcome measures.

**HYPERTENSION MEDICATIONS: Used in analyses of diastolic and systolic blood pressure.**

| <b>Medication (generic name)</b> | <b>Drug Class</b>                  |
|----------------------------------|------------------------------------|
| LISINOPRIL                       | ace inhibitor                      |
| LISINOPRIL/HCTZ                  | ace inhibitor                      |
| DOXAZOSIN                        | alpha blocker                      |
| PRAZOSIN                         | alpha blocker                      |
| LOSARTAN                         | angiotensin II receptor antagonist |
| CLONIDINE                        | antihypertensive                   |
| METOPROLOL                       | beta blocker                       |
| PROPRANOLOL                      | beta blocker                       |
| LABETALOL                        | beta blocker                       |
| ATENOLOL                         | beta blocker                       |
| AMLODIPINE                       | calcium channel blocker            |
| DILTIAZEM                        | calcium channel blocker            |
| VERAPAMIL                        | calcium channel blocker            |
| FUROSEMIDE                       | diuretic                           |
| TRIAMTERENE/HYDROCHLOROTHIAZIDE  | diuretic                           |
| TRIAMTERENE                      | diuretic                           |
| HYDROCHLOROTHIAZIDE              | thiazide                           |
| CHLORTHALIDONE                   | thiazide                           |

**DIABETES MEDICATIONS: Used in analyses of fasting glucose, fasting insulin, Framingham Diabetes Risk Score, and HOMA-IR index.**

| <b>Medication (generic name)</b> | <b>Drug Class</b> |
|----------------------------------|-------------------|
| EXENATIDE                        | antidiabetic      |
| INSULIN                          | antidiabetic      |
| INSULIN ISOPHANE                 | antidiabetic      |
| INSULIN GLARGINE                 | antidiabetic      |
| INSULIN LISPRO                   | antidiabetic      |
| METFORMIN                        | hypoglycemic      |
| GLIPIZIDE                        | hypoglycemic      |
| GLIMEPIRIDE                      | hypoglycemic      |
| GLYBURIDE                        | hypoglycemic      |

**CHOLESTEROL MEDICATIONS: Used in analyses of HDL and LDL Cholesterol.**

| <b>Medication (generic name)</b> | <b>Drug Class</b>  |
|----------------------------------|--------------------|
| EZETIMIBE                        | antihyperlipidemic |

|                |                       |
|----------------|-----------------------|
| CHOLESTYRAMINE | bile acid sequestrant |
| COLESTIPOL     | bile acid sequestrant |
| PRAVASTATIN    | statin                |
| LOVASTATIN     | statin                |
| SIMVASTATIN    | statin                |
| ATORVASTATIN   | statin                |
| ROSUVASTATIN   | statin                |

**CHOLESTEROL AND TRIGLYCERIDE LOWERING MEDICATIONS: Used in analyses of HDL and LDL cholesterol and analyses of triglycerides.**

| <b>Medication (generic name)</b> | <b>Drug Class</b> |
|----------------------------------|-------------------|
| FENOFIBRATE                      | fibrate           |
| GEMFIBROZIL                      | fibrate           |
| NIACIN                           | nicotinic acid    |
